# Supplementary material
Source: PubMed Central journal article supplement (PMC1415292)
Supplement: mbc_E05-10-0912_3.pdf [file mbc_E05-10-0912_3.pdf]

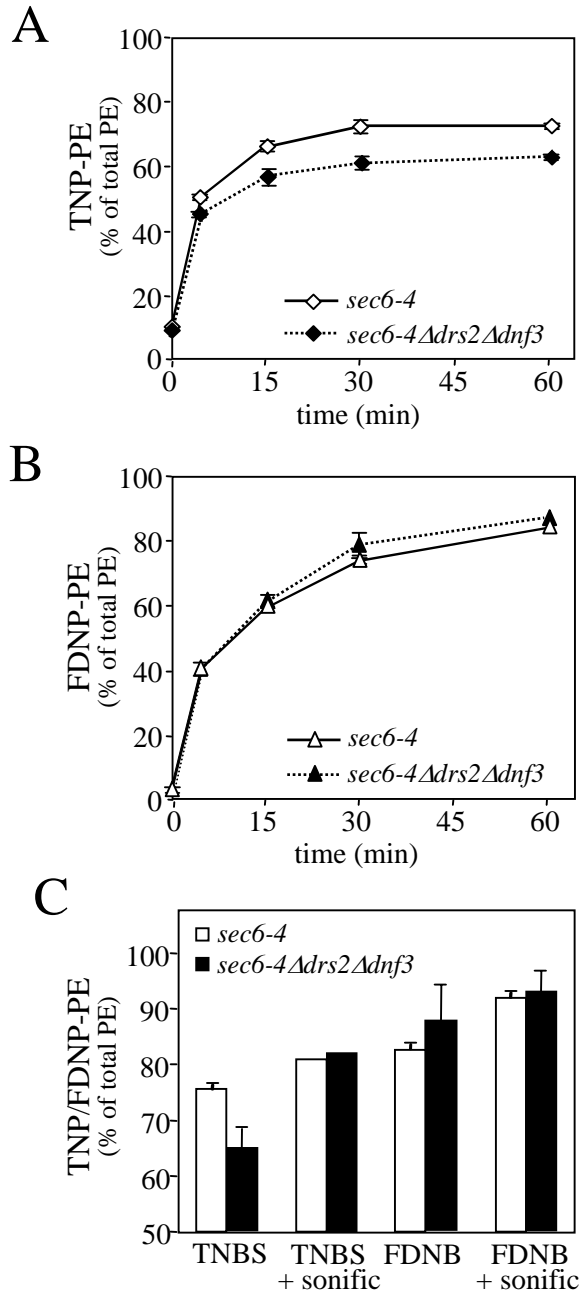

**Supplementary Figure 3.** Loss of Drs2p and Dnf3p reduces the TNBS-reactive PE pool in SV-enriched membranes. Post nuclear supernatants prepared from 38°C-shifted *sec6-4* or *sec6-4Δdrs2Δdnf3* cells were incubated with (A) trinitrobenzene sulfonic acid (TNBS) or (B) 1-fluoro-2,4-dinitrobenzene (FDNB) at 25°C. At the indicated time points, the reaction was stopped by addition of glycylglycine and SV-enriched membranes were isolated by differential centrifugation and subjected to lipid analysis as described in Material and Methods. Percentages of TNBS- or FDNB-reacted PE relative to total PE are shown as the means ± range of two independent experiments in duplicate. (C) Post nuclear supernatants prepared from 38°C-shifted *sec6-4* or *sec6-4Δdrs2Δdnf3* cells were incubated with TNBS or FDNB for 30 min at 25°C with or without prior sonification (sonific). Percentages of TNBS- or FDNB-reacted PE relative to total PE are shown as the means ± S.D. of two independent experiments in duplicate.
